# Supplementary material for: Efficacy and safety profile of intravitreal dexamethasone implant versus antivascular endothelial growth factor treatment in diabetic macular edema: a systematic review and meta-analysis
Source: Springer Nature journal article supplement (doi:10.1038/s41598-023-34673-z), 2023-05-08
Supplement: MOESM1 [file 41598_2023_34673_MOESM1_ESM.pdf]

---

**Efficacy and safety profile of  
intravitreal dexamethasone implant  
versus antivascular endothelial growth  
factor treatment: a systematic review  
and meta-analysis**

**(Supplemental Materials)**

---

# Supplemental Material

**Supplemental Material 1.** Search strategy

**Supplemental Material 2.** Funnel plot of BCVA change

**Supplemental Material 3.** Funnel plot of CRT change

**Supplemental Material 4.** Funnel plot of IOP change

**Supplemental Material 5.** Funnel plot of SAE occurrence

**Supplemental Material 6.** BCVA change – subgroup analysis of nonresistant DME patients

**Supplemental Material 7.** BCVA change – meta-regression

**Supplemental Material 8.** CRT change – subgroup analysis of nonresistant DME patients

**Supplemental Material 9.** CRT change – meta-regression

**Supplemental Material 10.** Forest plot of IOP change and subgroup analysis of nonresistant DME patients

**Supplemental Material 11.** IOP change – meta-regression

**Supplemental Material 12.** Severe ocular adverse events and subgroup analysis of nonresistant DME patients

**Supplemental Material 13.** Risk of bias assessment (ROB)

**Supplemental Material 14.** Risk of bias assessment ROBINS-1 (BCVA)

**Supplemental Material 15.** Subgroup analysis - type of Anti-vegf - BCVA change

**Supplemental Material 16.** Subgroup analysis - type of Anti-vegf - CRT decrease

**Supplemental Material 17.** Subgroup analysis - study design - BCVA change

**Supplemental Material 18.** Subgroup analysis - study design - CRT decrease

**Supplemental Material 19.** Summary of OCT biomarker

**Supplemental Material 1**  
**Search strategy**

# Supplemental Material 1

## Search strategy

### Primary search steps:

- #1 anti- vascular endothelial growth factors
- #2 anti-VEGF
- #3 ranibizumab
- #4 lucentis
- #5 aflibercept
- #6 eylea
- #7 bevacizumab
- #8 avastin
- #9 #1 OR #2 OR #3 OR #4 OR #5 OR #6 OR #7 OR #8
- #10 ozurdex
- #11 intravitreal dexamethasone implant
- #12 dexamethasone
- #13 #10 OR #11 OR #12
- #14 diabetic retinopathy
- #15 diabetic macular edema
- #16 DME
- #17 DMO
- #18 cystoid macular edema
- #19 CME
- #20 #16 OR #17 OR #18 OR #19
- #21 #9 AND #13 AND #20

### Final syntax in PubMed (an example):

(((((((((anti- vascular endothelial growth factors) OR (anti-VEGF)) OR (ranibizumab)) OR (lucentis)) OR (aflibercept)) OR (eylea)) OR (bevacizumab)) OR (avastin)) AND (((ozurdex) OR (intravitreal dexamethasone implant)) OR (dexamethasone))) AND (((DME) OR (DMO)) OR (cystoid macular edema)) OR (CME)) Sort by: Publication Date

**Supplemental Material 2**  
**Funnel plot of BCVA change**

# Supplemental Material 2

## Funnel plot of BCVA change

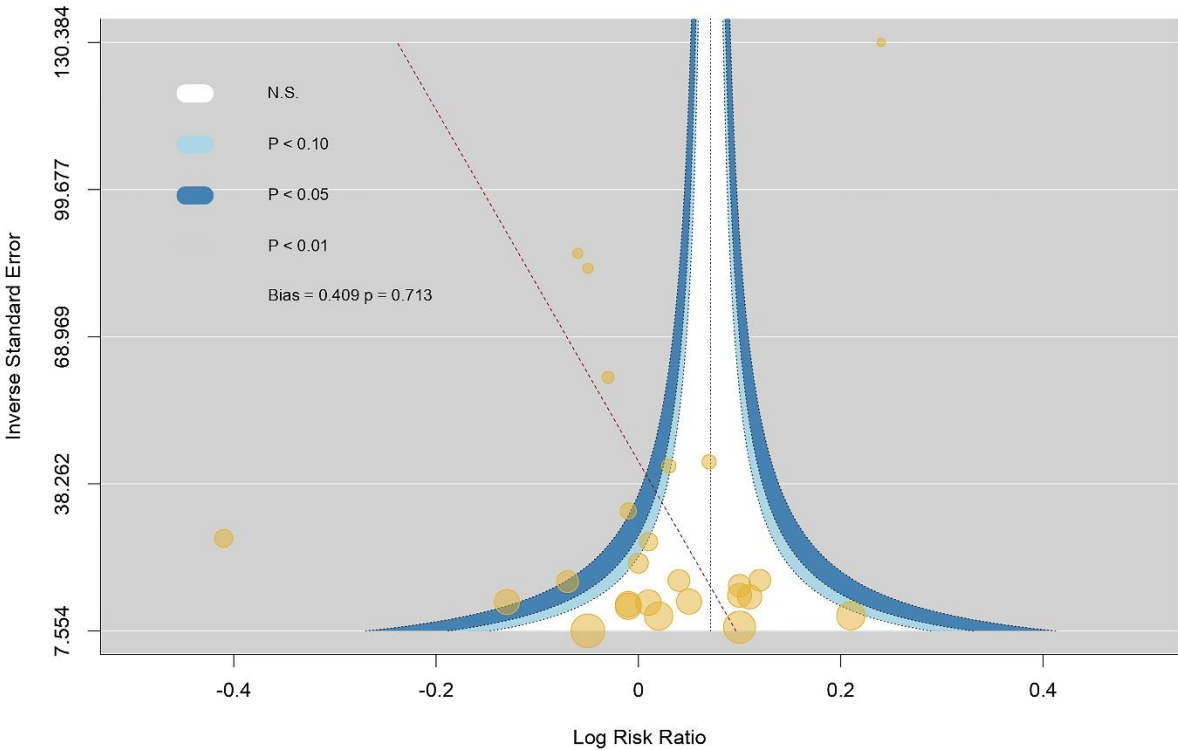

**Supplemental Material 3**  
**Funnel plot of CRT change**

# Supplemental Material 3

## Funnel plot of CRT change

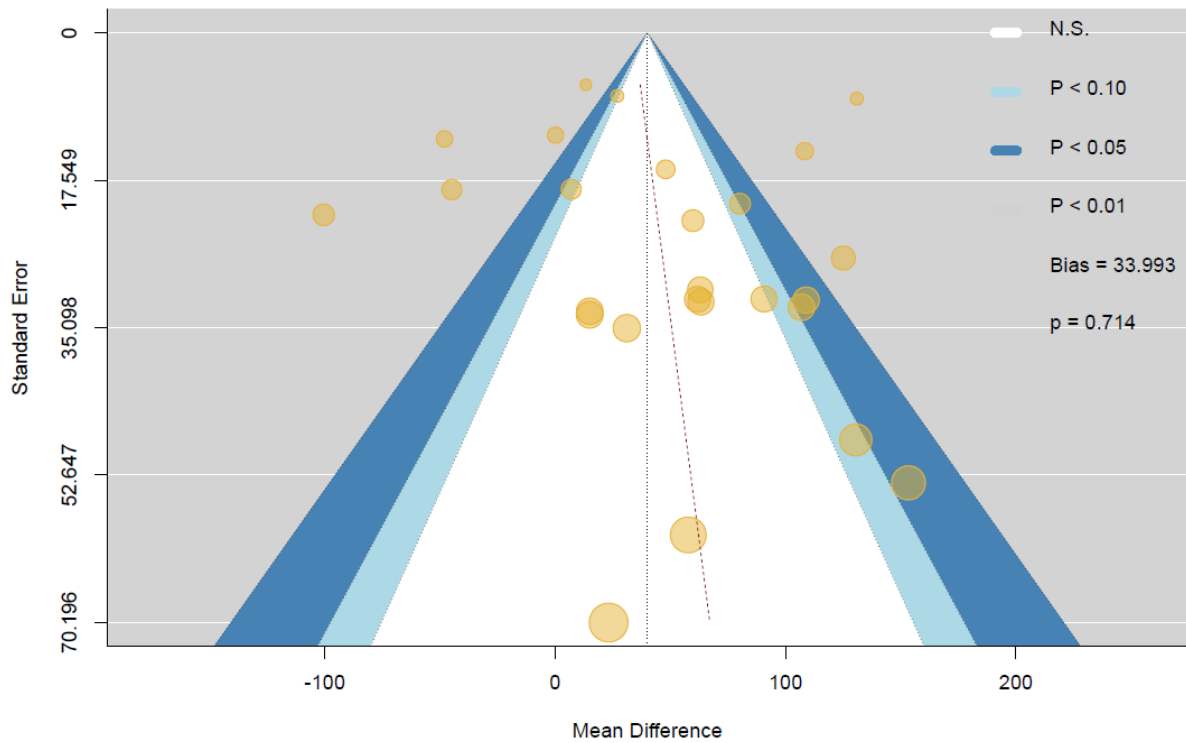



**Supplemental Material 4**  
**Funnel plot of IOP change**

# Supplemental Material 4

## Funnel plot of IOP change

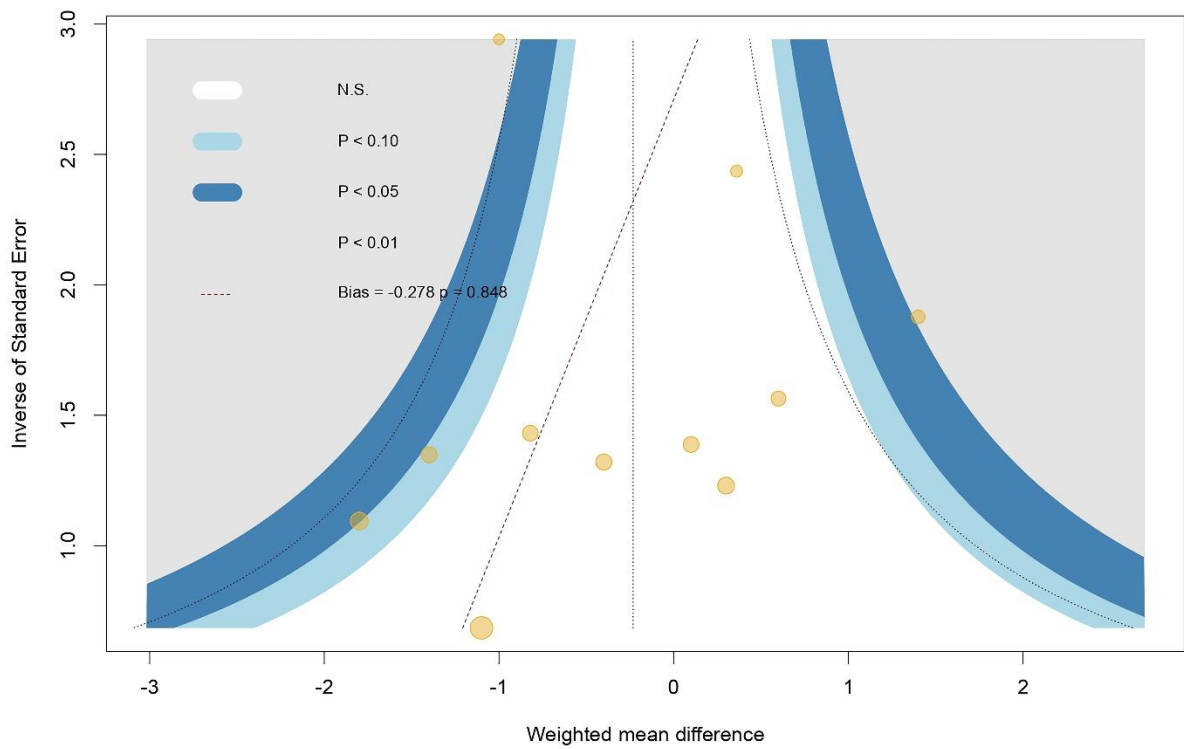

**Supplemental Material 5**  
**Funnel plot of SAE occurrence**

# Supplemental Material 5

## Funnel plot of SAE occurrence

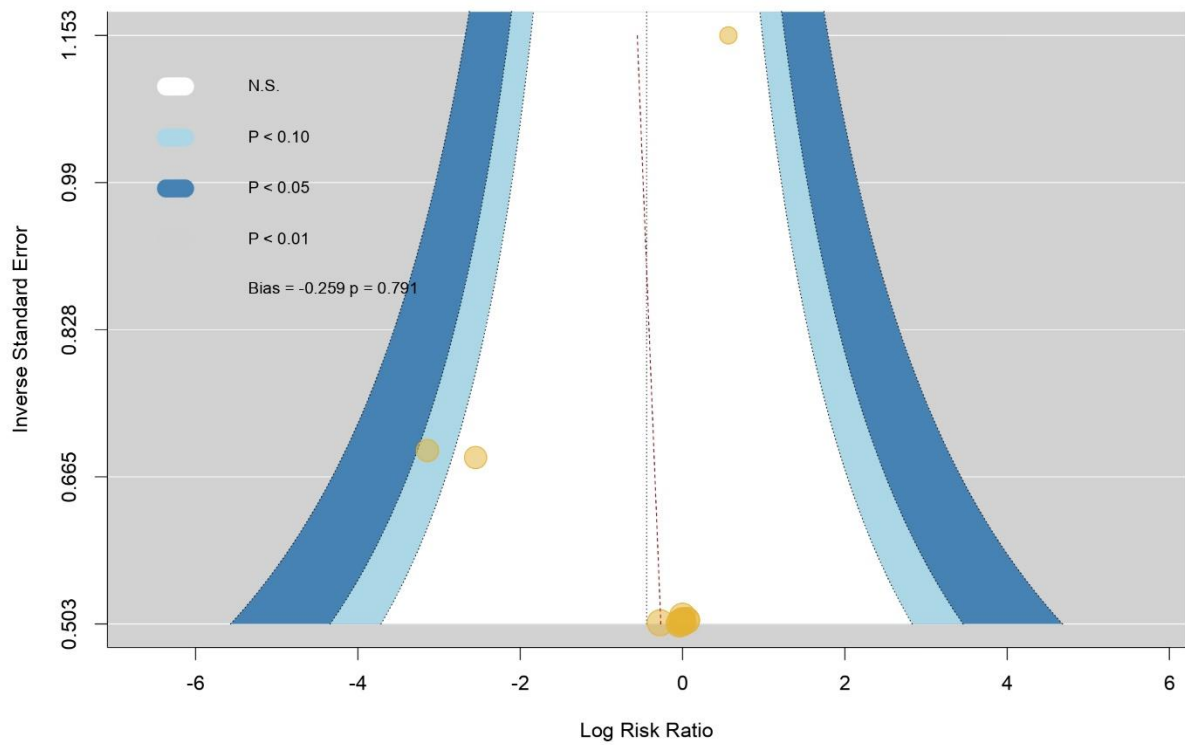

**Supplemental Material 6**  
**BCVA change –**  
**subgroup analysis of nonresistant DME patients**

# Supplemental Material 6

## BCVA change – subgroup analysis of nonresistant DME patients

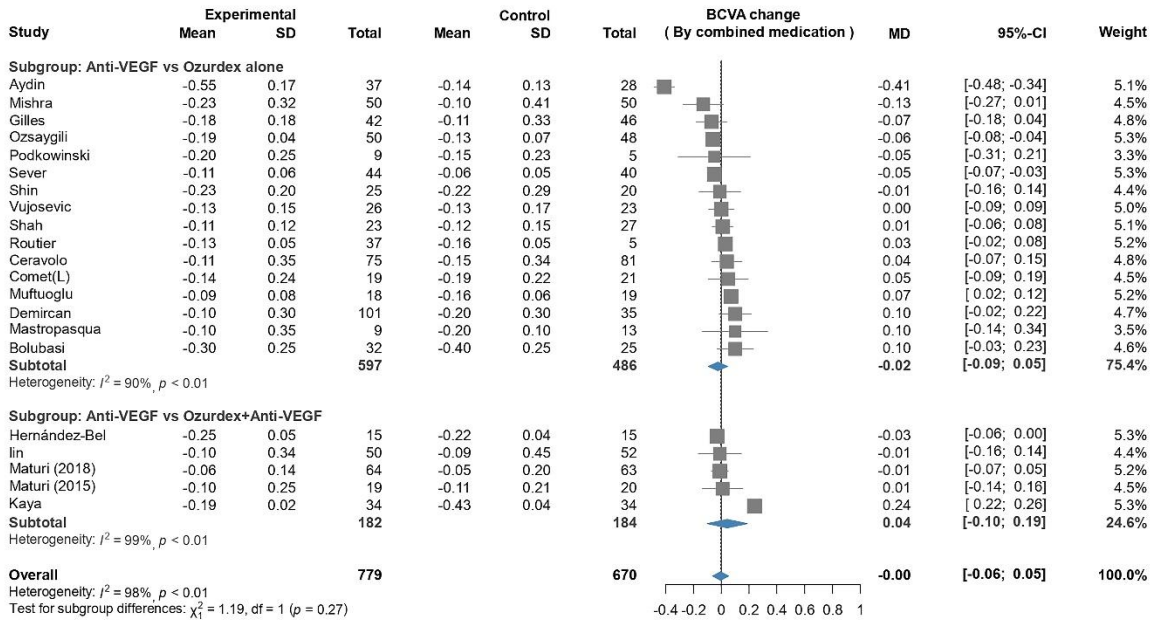

**Supplemental Material 7**  
**BCVA change –**  
**meta-regression**

Supplemental Material 7  
BCVA change - meta-regression

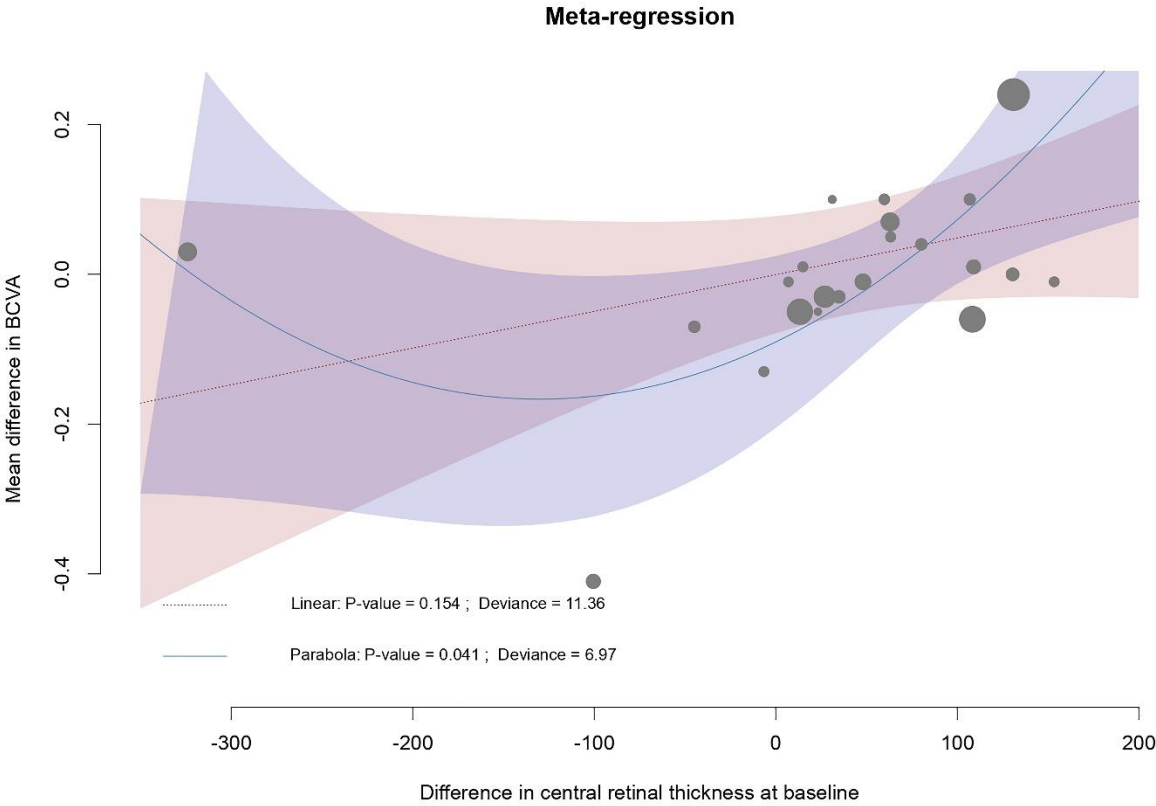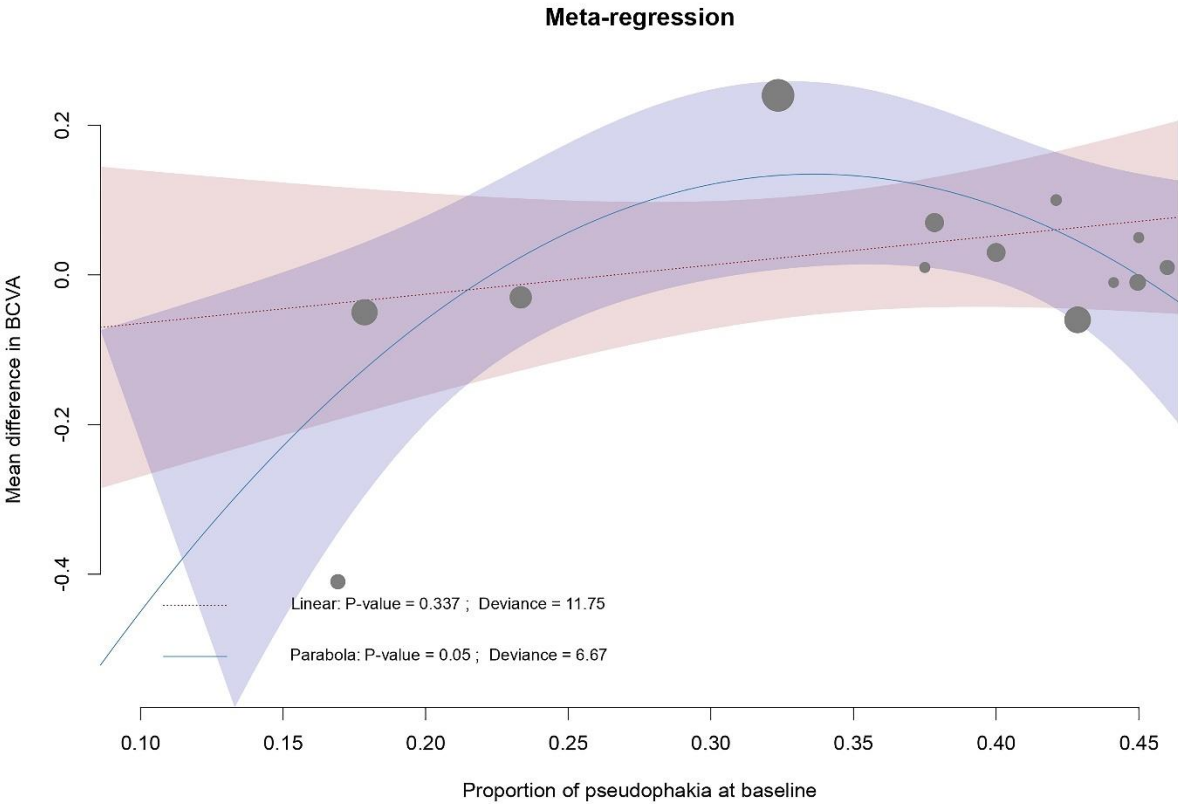



**Supplemental Material 8**  
**CRT change –**  
**subgroup analysis of nonresistant DME patients**

# Supplemental Material 8

## CRT change – subgroup analysis of nonresistant DME patients

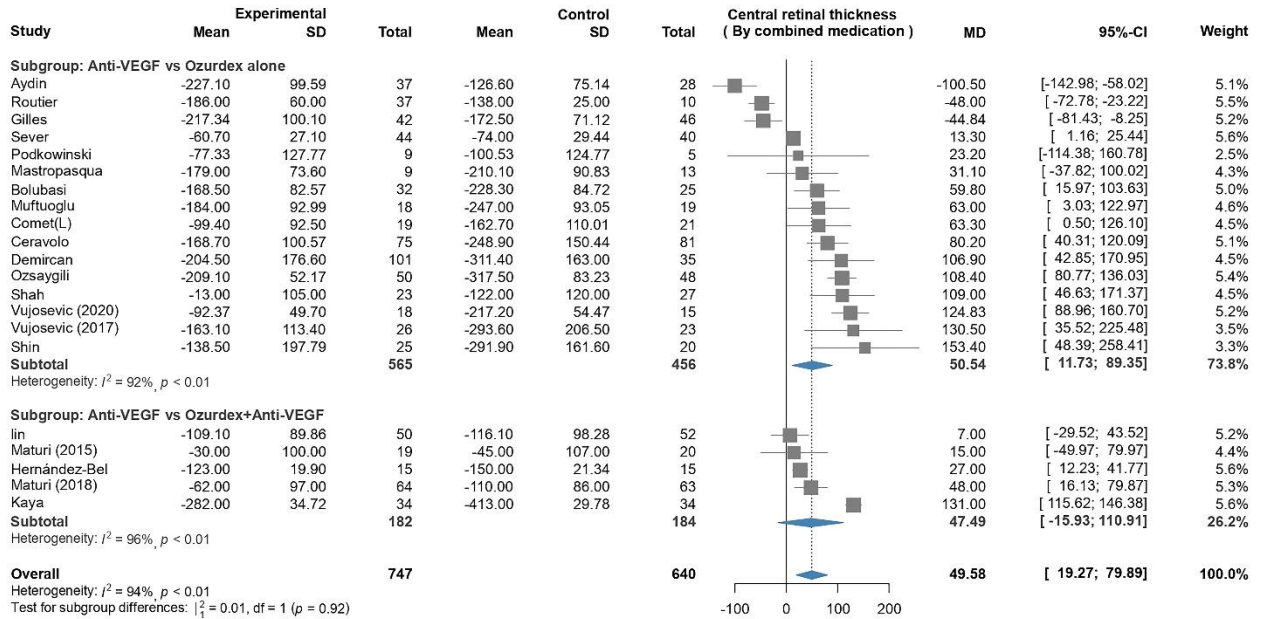

**Supplemental Material 9**  
**CRT change –**  
**meta-regression**

# Supplemental Material 9

## CRT change – meta-regression

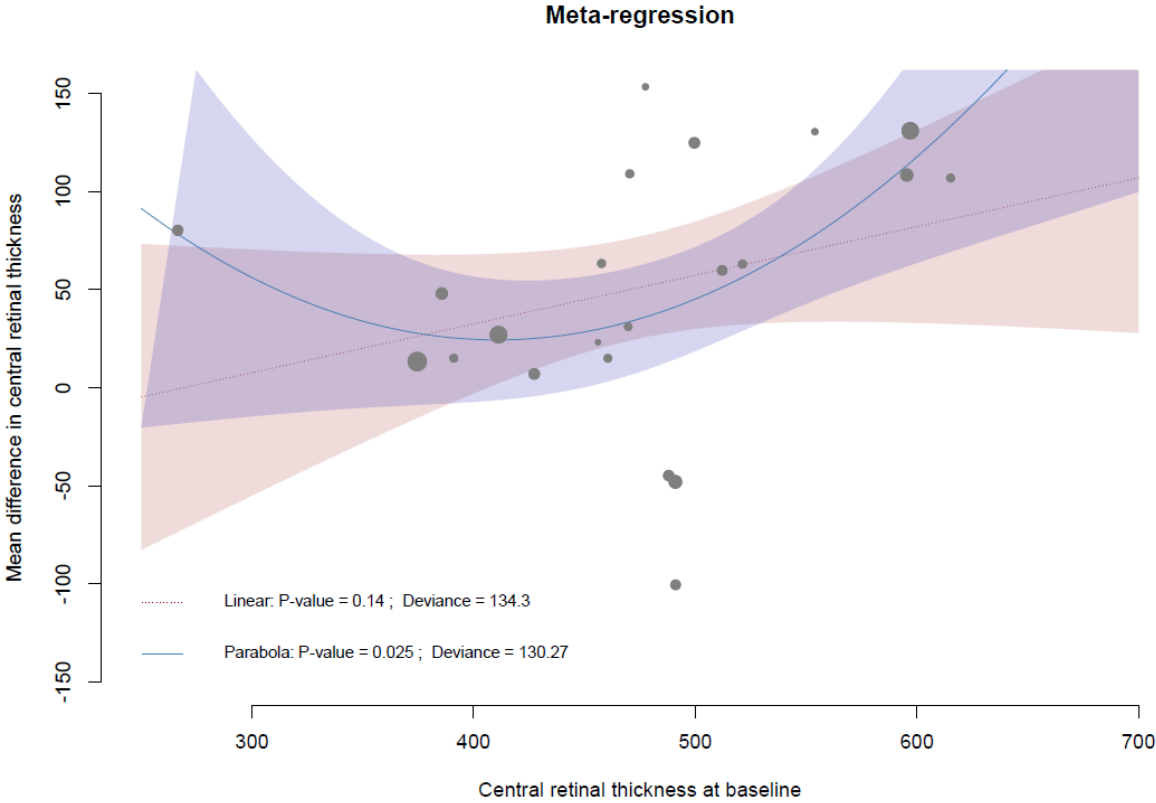

**Supplemental Material 10**  
**Forest plot of of IOP change and**  
**subgroup analysis of nonresistant DME patients**

# Supplemental Material 10

## Forest plot of IOP change and subgroup analysis of nonresistant DME patients

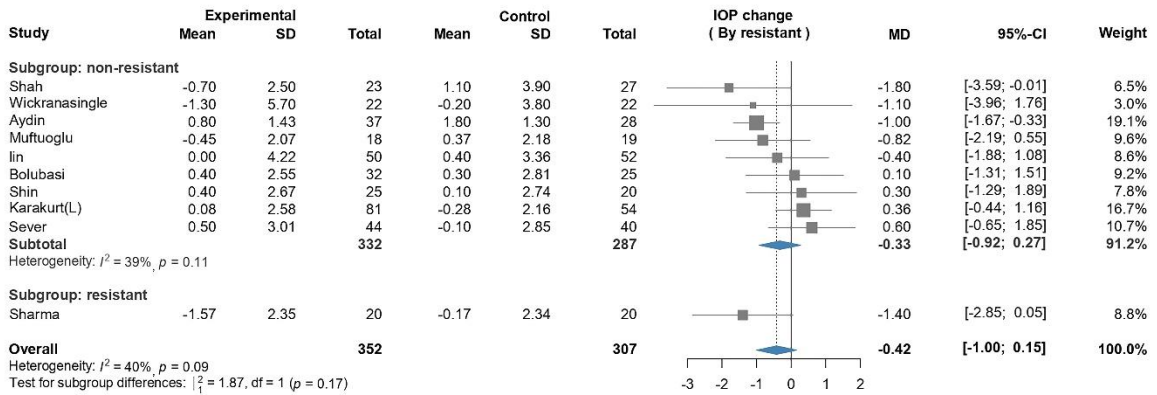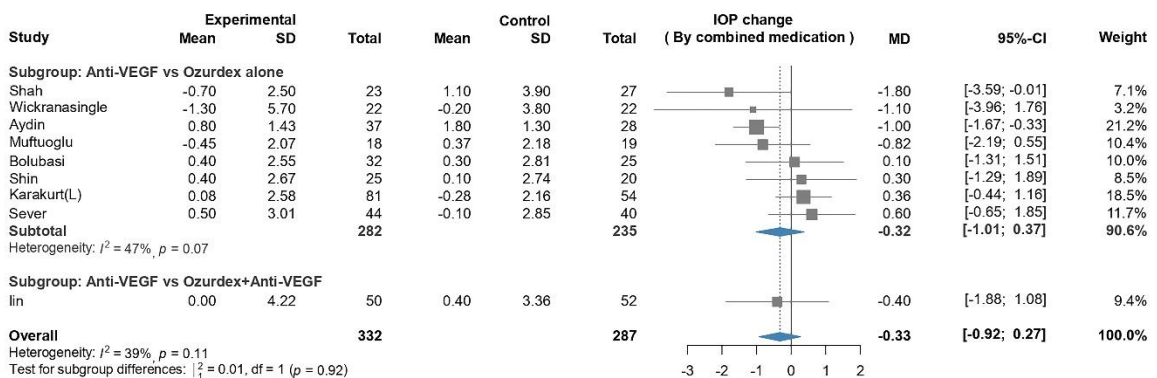

**Supplemental Material 11**  
**IOP change – meta-regression**

# Supplemental Material 11

## IOP change – meta-regression

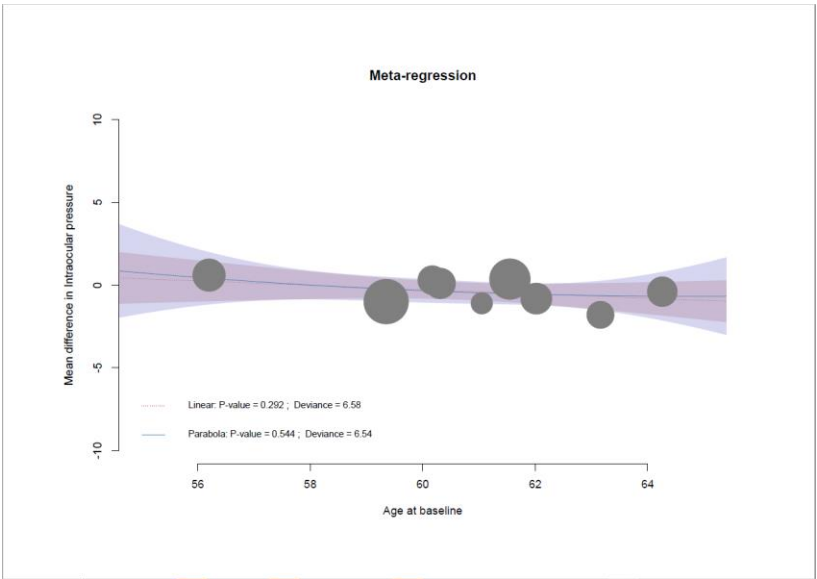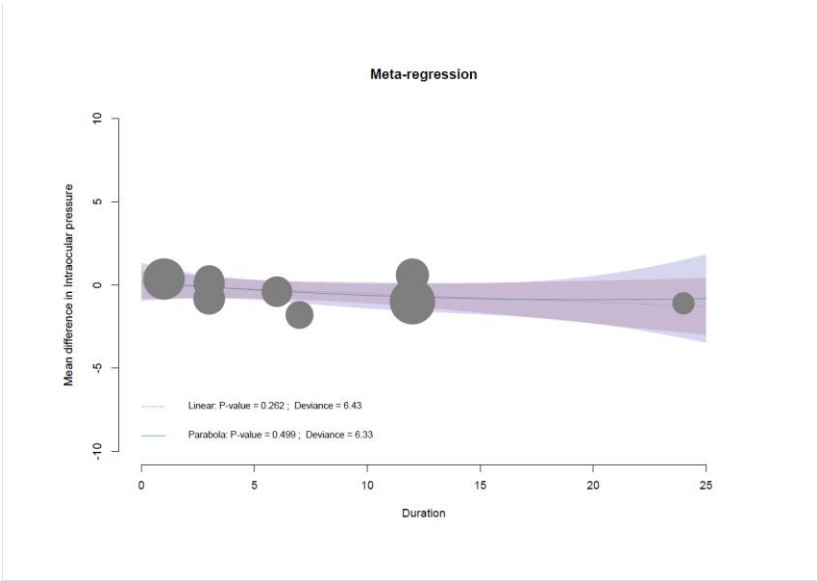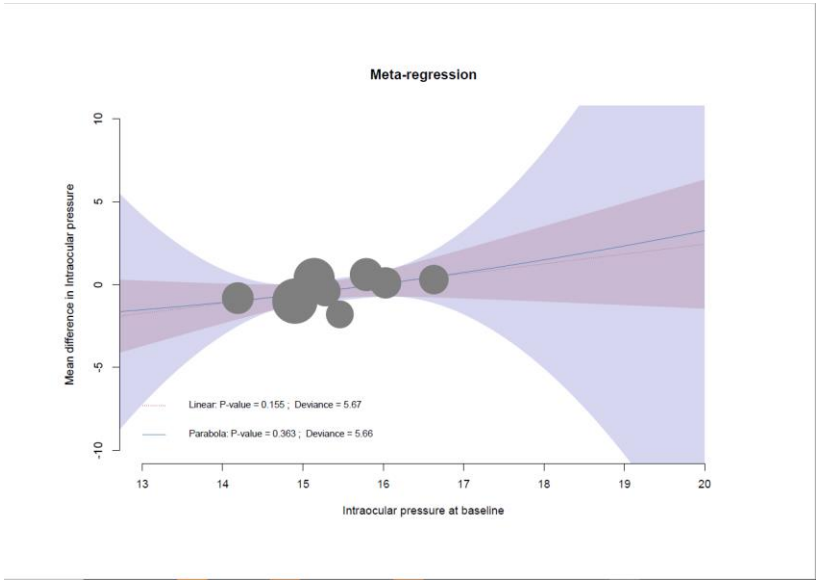



**Supplemental Material 12**  
**Severe ocular adverse events and  
subgroup analysis of nonresistant DME patients**

# Supplemental Material 12

## Severe ocular adverse events and subgroup analysis of nonresistant DME patients

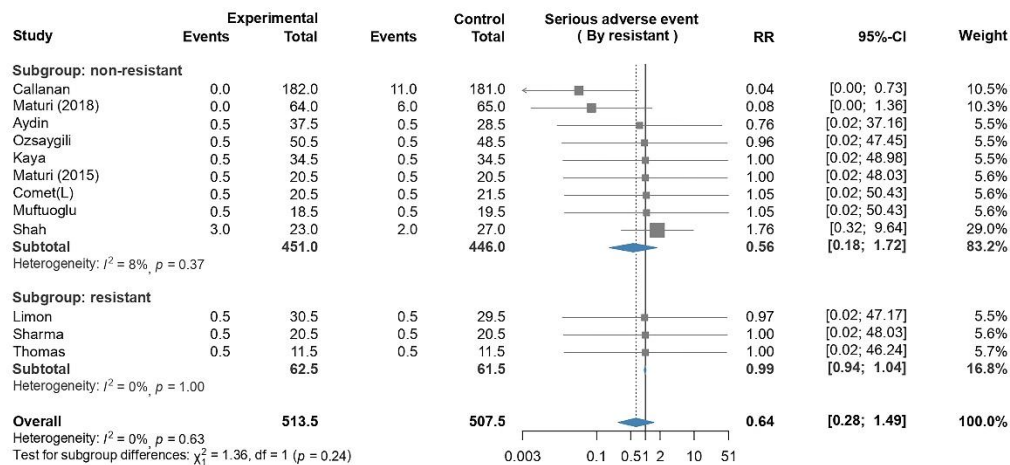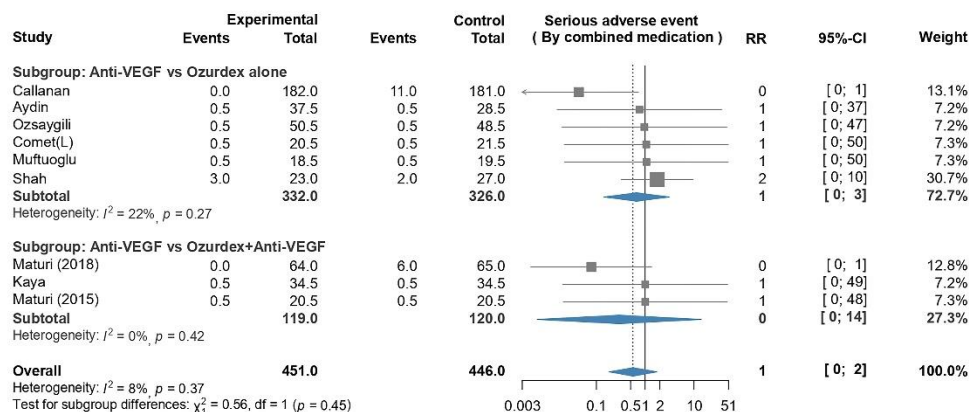

**Supplemental Material 13**  
**Risk of bias assessment**  
**ROB**

# Supplemental Material 13

## Risk of bias assessment (ROB)

|                  | Random sequence generation (selection bias) | Allocation concealment (selection bias) | Blinding of participants and personnel (performance bias) | Blinding of outcome assessment (detection bias) | Incomplete outcome data (attrition bias) | Selective reporting (reporting bias) | Other bias |
|------------------|---------------------------------------------|-----------------------------------------|-----------------------------------------------------------|-------------------------------------------------|------------------------------------------|--------------------------------------|------------|
| Callanan 2017    | +                                           | +                                       | -                                                         | +                                               | +                                        | -                                    | ○          |
| Kaya 2021        | ○                                           | ○                                       | -                                                         | ○                                               | +                                        | +                                    | ○          |
| Maturi 2015      | ○                                           | ○                                       | ○                                                         | ○                                               | +                                        | +                                    | ○          |
| Maturi 2018      | +                                           | +                                       | -                                                         | +                                               | +                                        | +                                    | +          |
| Mishira 2021     | ○                                           | ○                                       | ○                                                         | ○                                               | +                                        | +                                    | ○          |
| Ozsaygili 2020   | +                                           | ○                                       | -                                                         | +                                               | +                                        | +                                    | ○          |
| Podkowinski 2019 | ○                                           | ○                                       | ○                                                         | ○                                               | -                                        | +                                    | ○          |
| shah 2016        | +                                           | +                                       | ○                                                         | ○                                               | +                                        | +                                    | ○          |
| Sharma 2019      | +                                           | ○                                       | -                                                         | -                                               | ○                                        | +                                    | ○          |

**Supplemental Material 14**  
**Risk of bias assessment**  
**ROBINS-1 (BCVA)**

# Supplemental Material 14

## Risk of bias assessment ROBINS-1 (BCVA)

| Study              | Bias due to confounding | Bias in selection of participants into the study | Bias in classification of interventions | Bias due to deviations from intended interventions | Bias due to missing data | Bias in measurement of outcomes | Bias in selection of the reported result | Overall Bias |
|--------------------|-------------------------|--------------------------------------------------|-----------------------------------------|----------------------------------------------------|--------------------------|---------------------------------|------------------------------------------|--------------|
| AKSOY 2020         | Serious                 | Low                                              | Low                                     | NI                                                 | Low                      | Moderate                        | Moderate                                 | Serious      |
| Aydin 2020         | Low                     | Low                                              | Low                                     | NI                                                 | Low                      | Moderate                        | Low                                      | Moderate     |
| Bolubasi 2019      | Serious                 | Low                                              | Low                                     | NI                                                 | Low                      | Moderate                        | Low                                      | Serious      |
| Busch 2019         | Moderate                | Low                                              | Low                                     | NI                                                 | Low                      | Low                             | Low                                      | Moderate     |
| Ceravolo 2020      | Low                     | Low                                              | Low                                     | NI                                                 | Low                      | Moderate                        | Low                                      | Moderate     |
| Comet 2020         | Low                     | Low                                              | Low                                     | Moderate                                           | Low                      | Moderate                        | Low                                      | Moderate     |
| Demircan 2018      | Serious                 | Low                                              | Low                                     | NI                                                 | Low                      | Moderate                        | Low                                      | Serious      |
| Hernández-Bel 2019 | Low                     | Low                                              | Low                                     | NI                                                 | Low                      | Moderate                        | Low                                      | Moderate     |
| Limon 2021         | Low                     | Low                                              | Low                                     | Low                                                | Low                      | Moderate                        | Low                                      | Moderate     |
| Lin 2021           | Serious                 | Low                                              | Low                                     | NI                                                 | Low                      | Moderate                        | Low                                      | Serious      |
| Mastropasqua 2019  | Low                     | Low                                              | Low                                     | NI                                                 | Moderate                 | Moderate                        | Low                                      | Moderate     |
| Muftuogluet 2021   | Low                     | Low                                              | Low                                     | Low                                                | Low                      | Moderate                        | Low                                      | Moderate     |
| Routier 2021       | Serious                 | Low                                              | Low                                     | NI                                                 | Low                      | Low                             | Low                                      | Serious      |
| Rijbsam 2021       | Serious                 | Low                                              | Low                                     | NI                                                 | Low                      | Low                             | Low                                      | Serious      |
| Sever 2017         | Serious                 | Low                                              | Low                                     | NI                                                 | Low                      | Moderate                        | Low                                      | Serious      |
| Shin 2017          | Serious                 | Low                                              | Low                                     | NI                                                 | Moderate                 | Low                             | Low                                      | Serious      |
| Thomas 2016        | Low                     | Low                                              | Low                                     | NI                                                 | Low                      | Moderate                        | Low                                      | Moderate     |
| Vujosevic 2017     | Serious                 | Low                                              | Low                                     | Low                                                | Low                      | Moderate                        | Low                                      | Serious      |

**Supplemental Material 15**  
**Subgroup analysis**  
**type of Anti-vegf**  
**BCVA change**

# Supplemental Material 15

## Subgroup analysis type of Anti-vegf BCVA change

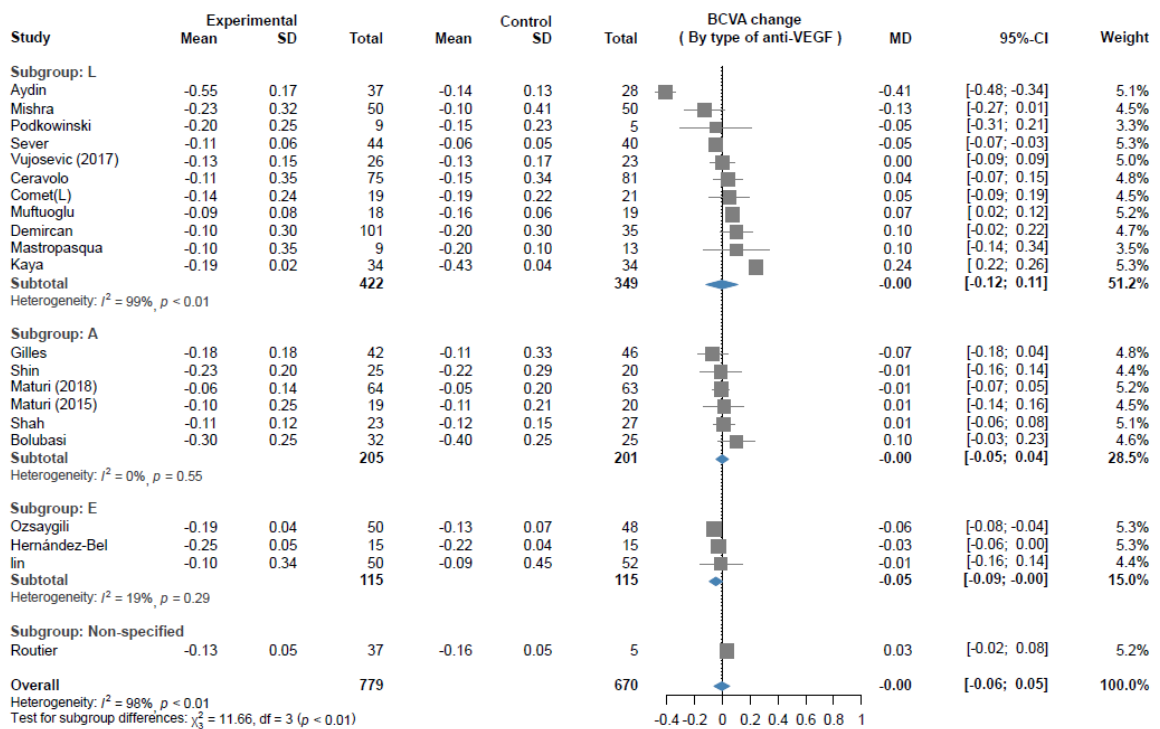

\*

Subgroup L= Ranibizumab (Lucentis) group

Subgroup A= Bevacizumab (Avastin) group

Subgroup E= Aflibercept (Eylea) group



**Supplemental Material 16**  
**Subgroup analysis**  
**type of Anti-vegf**  
**CRT decrease**

# Supplemental Material 16

## Subgroup analysis type of Anti-vegf CRT decrease

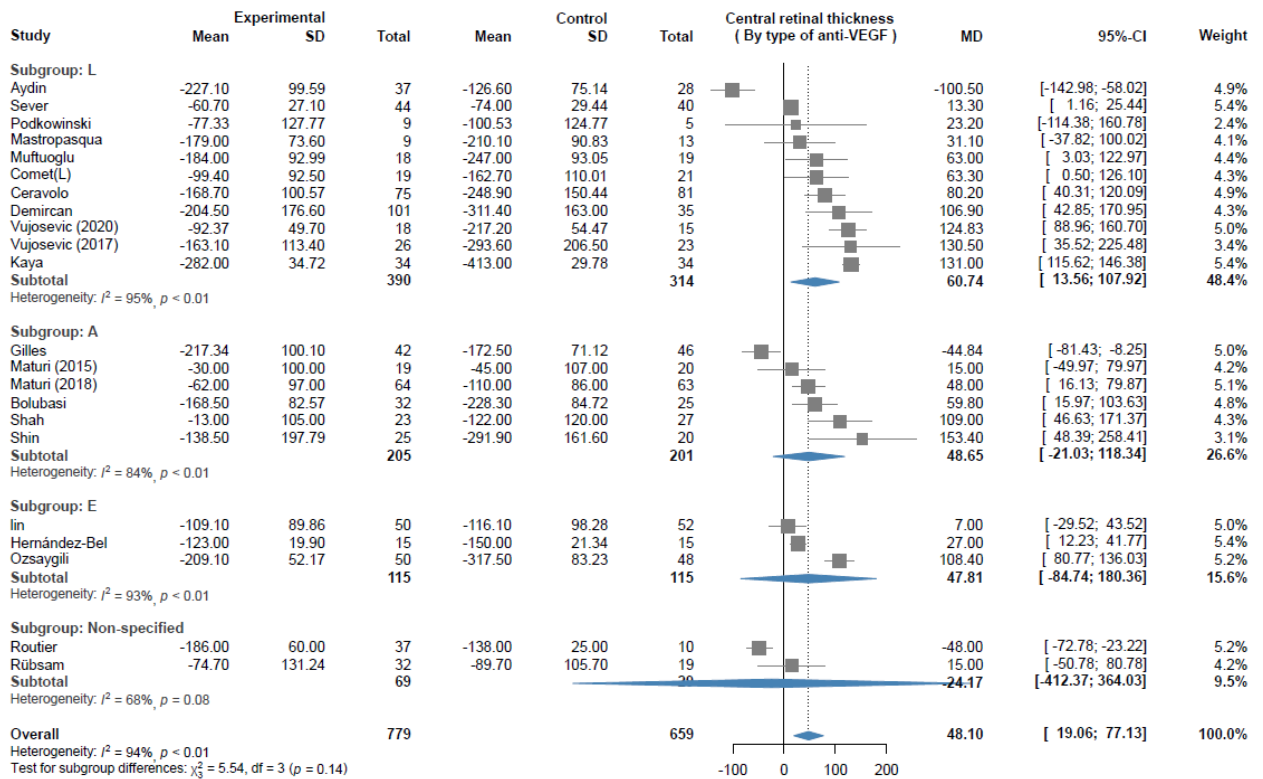

Subgroup L= Ranibizumab (Lucentis) group

Subgroup A= Bevacizumab (Avastin) group

Subgroup E= Aflibercept (Eylea) group

**Supplemental Material 17**  
**Subgroup analysis**  
**study design**  
**BCVA change**

# Supplemental Material 17

## Subgroup analysis study design BCVA change

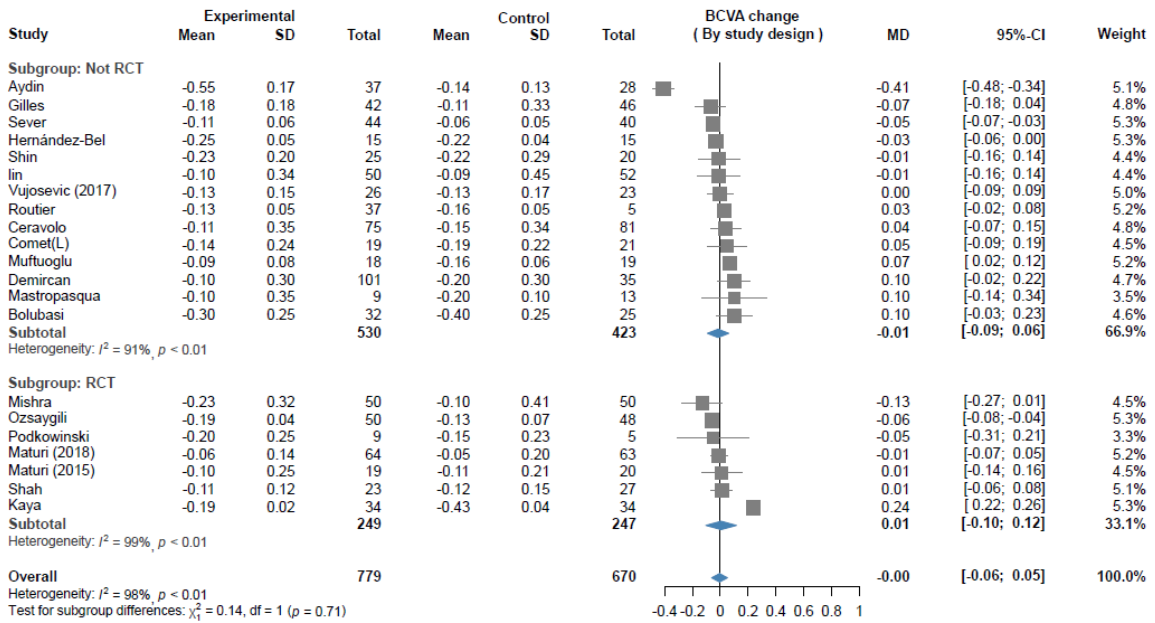

**Supplemental Material 18**  
**Subgroup analysis**  
**study design**  
**CRT decrease**

# Supplemental Material 18

## Subgroup analysis study design CRT decrease

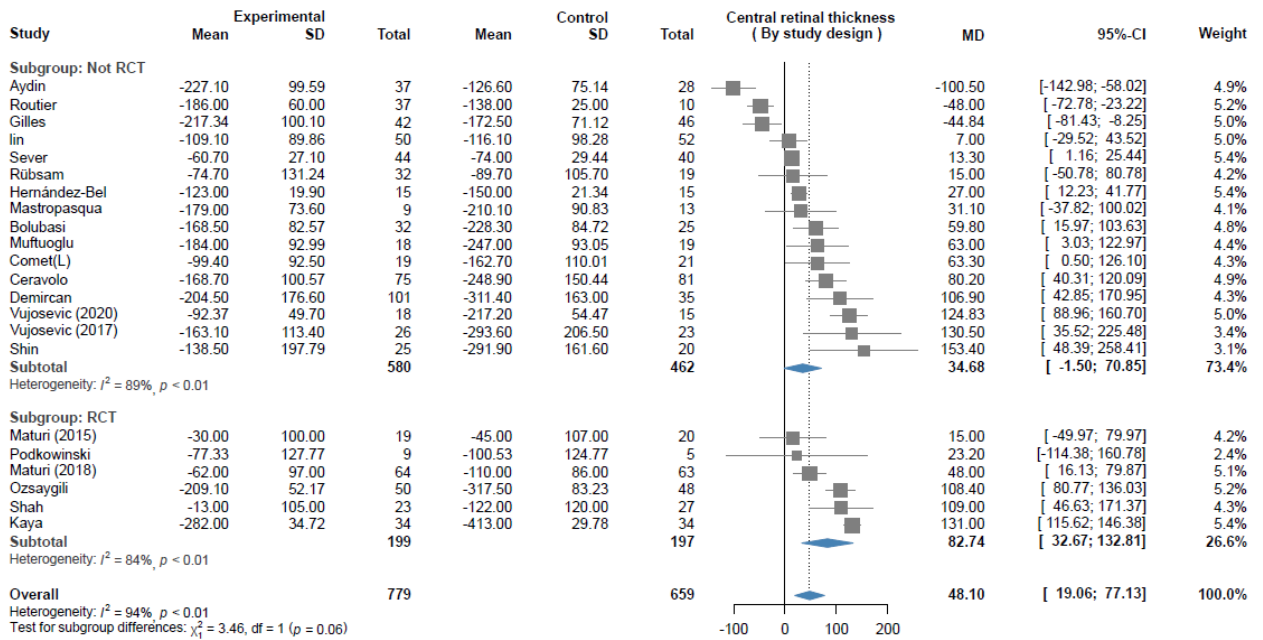

**Supplemental Material 19**  
**Summary of OCT biomarker**

# Supplemental Material 19

## Summary of OCT biomarker

| Study                | Treatment      | Hyperreflective dots (HRD) change (numbers) | Hyperreflective dots (HRD) yes/no, after treatment(eye) | Subfoveal serous retinal detachment (SRD) change (um) | Change of choroidal thickness change (um) | disorganization of inner retinal layers (DRIL) (um) |
|----------------------|----------------|---------------------------------------------|---------------------------------------------------------|-------------------------------------------------------|-------------------------------------------|-----------------------------------------------------|
| Aksoy et al          | 1. Aflibercept |                                             |                                                         |                                                       | -92.94                                    |                                                     |
|                      | 2. Ozurdex     |                                             |                                                         |                                                       | -94.58                                    |                                                     |
| Bolubasi et al       | 1. Bevacizumab |                                             |                                                         | -110.69                                               |                                           |                                                     |
|                      | 2. Ozurdex     |                                             |                                                         | -162.66*                                              |                                           |                                                     |
| Ceravolo et al       | 1. Ranibizumab | -6.7                                        |                                                         | -37.4                                                 | -1.9                                      |                                                     |
|                      | 2. Ozurdex     | -13.22*                                     |                                                         | -89.3*                                                | -28.6                                     |                                                     |
| Demircan et al       | 1. Ranibizumab |                                             |                                                         | -133.6                                                |                                           |                                                     |
|                      | 2. Ozurdex     |                                             |                                                         | -133.6                                                |                                           |                                                     |
| Hernández-Bel et al  | 1. Aflibercept |                                             | 10/5                                                    | 5/10 (resolution after tx)                            |                                           |                                                     |
|                      | 2. Ozurdex+    |                                             | 7/8                                                     | 7/6 (resolution after tx)                             |                                           |                                                     |
|                      | Aflibercept    |                                             |                                                         |                                                       |                                           |                                                     |
| Vujosevic et al 2017 | 1. Ranibizumab | -28                                         |                                                         | 5/10 (resolution after tx)                            | -9.3%                                     |                                                     |
|                      | 2.Ozurdex      | -32.4                                       |                                                         | 7/6 (resolution after tx)                             | -11.3%                                    |                                                     |
| Vujosevic et al 2020 | 1. Ranibizumab | -5.94                                       |                                                         | -96.7%                                                |                                           | -80.52                                              |
|                      | 2.Ozurdex      | -21.38*                                     |                                                         | -86.8%                                                |                                           | -394.65                                             |

\* Ozurdex group had significant change comparing with Anti-VEGF group
